# Supplementary material
Source: Copernicus journal article supplement (doi:10.5194/egusphere-2025-6284)
Supplement: Supplementary file 1 [file egusphere-2025-6284-supplement.pdf]

Supplemental Information for

## **Shifting Drivers of China's Methane Emissions amid Economic Growth and Mitigation between 2019–2024**

Yifan Li<sup>1,2,3</sup>, Drew C. Pendergrass<sup>2,#</sup>, Daniel J. Jacob<sup>2</sup>, Yunxiao Tang<sup>2</sup>,

Jiaxin Qiu<sup>1</sup>, Bo Zheng<sup>1,3,\*</sup>

<sup>1</sup> Shenzhen Key Laboratory of Ecological Remediation and Carbon Sequestration, Institute of Environment and Ecology, Tsinghua Shenzhen International Graduate School, Tsinghua University, Shenzhen 518055, China

<sup>2</sup> John A. Paulson School of Engineering and Applied Sciences, Harvard University, Cambridge, MA 02138, USA

<sup>3</sup> State Environmental Protection Key Laboratory of Sources and Control of Air Pollution Complex, Beijing 100084, China.

<sup>#</sup> Now at Nicholas School of the Environment, Duke University, Durham, NC 27708, USA.

*\* Correspondence to: Bo Zheng*

Email: bozheng@sz.tsinghua.edu.cn

### **This file includes:**

Supplementary Tables S1 to S3

Supplementary Figures S1 to S12

**Table S1.** Regional divisions and corresponding provinces of Chinese mainland.

| <b>Region</b>   | <b>Provinces</b>                                                         |
|-----------------|--------------------------------------------------------------------------|
| North China     | Beijing, Tianjin, Shanxi, Hebei, Inner Mongolia                          |
| East China      | Shanghai, Jiangsu, Zhejiang, Anhui, Fujian, Jiangxi,<br>Shandong, Taiwan |
| Northwest China | Shaanxi, Gansu, Qinghai, Ningxia, Xinjiang                               |
| Southwest China | Sichuan, Guizhou, Yunnan, Chongqing, Tibet                               |
| South China     | Guangdong, Guangxi, Hainan, Henan, Hubei, Hunan                          |
| Northeast China | Heilongjiang, Jilin, Liaoning                                            |

*Source:* [1]

**Table S2.** Comparison of surface ObsPack CH<sub>4</sub> observations with prior and posterior inversion results.

| <b>Site</b> | <b>Type</b> | <b>Lat</b><br>(°N) | <b>Lon</b><br>(°E) | <b>r</b><br>(ObsPack<br>vs. prior) | <b>r</b><br>(ObsPack vs.<br>posterior) | <b>ObsPack-<br/>Prior</b><br>(mean ± 1σ) | <b>ObsPack-<br/>Posterior</b><br>(mean ± 1σ) | <b>n</b> |
|-------------|-------------|--------------------|--------------------|------------------------------------|----------------------------------------|------------------------------------------|----------------------------------------------|----------|
| TAP         | flask       | 36.74              | 126.13             | 0.69                               | 0.69                                   | 5.5 ± 46.6                               | 2.3 ± 48.3                                   | 376      |
| RYO         | insitu      | 39.03              | 141.82             | 0.84                               | 0.85                                   | -1.1 ± 21.5                              | -2.5 ± 21.7                                  | 41151    |
| WLG         | flask       | 36.29              | 100.90             | 0.73                               | 0.72                                   | 32.1 ± 21.4                              | 32.2 ± 21.4                                  | 244      |
| UUM         | flask       | 44.45              | 111.10             | 0.62                               | 0.61                                   | 11.6 ± 23.1                              | 11.9 ± 23.2                                  | 92       |
| AMY         | flask       | 36.54              | 126.33             | 0.55                               | 0.61                                   | -4.2 ± 50.8                              | -11.0 ± 51.1                                 | 272      |

\* r denotes the Pearson correlation coefficient.

\* n denotes the number of valid observations included in the analysis.

\* ObsPack data were obtained from the dataset

*obspack\_ch4\_1\_GLOBALVIEWplus\_v7.0\_2024-10-29* [2].

**Table S3.** Comparison of annual CH<sub>4</sub> emission trends from our study and existing top-down and bottom-up estimates.

| Study                          | Time period      | Trend<br>(Tg yr <sup>-2</sup> ) | 95% confidence<br>interval (Tg yr <sup>-2</sup> ) |
|--------------------------------|------------------|---------------------------------|---------------------------------------------------|
| Our study                      | <b>2019–2024</b> | 0.8                             | ± 0.5                                             |
| Our study (anthropogenic)      |                  | 0.7                             | ± 0.7                                             |
| <b>Top-down</b>                |                  |                                 |                                                   |
| GONGGA-CH <sub>4</sub> [3]     | <b>2014–2018</b> | 0.5                             | ± 3.9                                             |
| GCP_Surface [4]                |                  | 0.0                             | ± 1.9                                             |
| GCP_Satellite [4]              |                  | 0.6                             | ± 3.1                                             |
| Janardanan et al. (2024) [5]   |                  | -0.1                            | ± 3.4                                             |
| Mean ± 1 standard error        |                  | 0.2 ± 0.4                       |                                                   |
| <b>Bottom-up</b>               |                  |                                 |                                                   |
| EDGAR_v8 [6]                   | <b>2014–2018</b> | 0.0                             | ± 1.4                                             |
| EDGAR_2024 [7]                 |                  | 0.1                             | ± 1.2                                             |
| FAO [8]                        |                  | 0.0                             | ± 1.3                                             |
| PKU-CH <sub>4</sub> v2 [9, 10] |                  | -0.9                            | ± 1.7                                             |
| CEDS_2025_03_18 [11]           |                  | 0.0                             | ± 1.4                                             |
| MMCP-v1 [12]                   |                  | -0.8                            | ± 1.3                                             |
| Mean ± 1 standard error        |                  | -0.3 ± 0.4                      |                                                   |

\* Emission trends were calculated using the Mann-Kendall test.

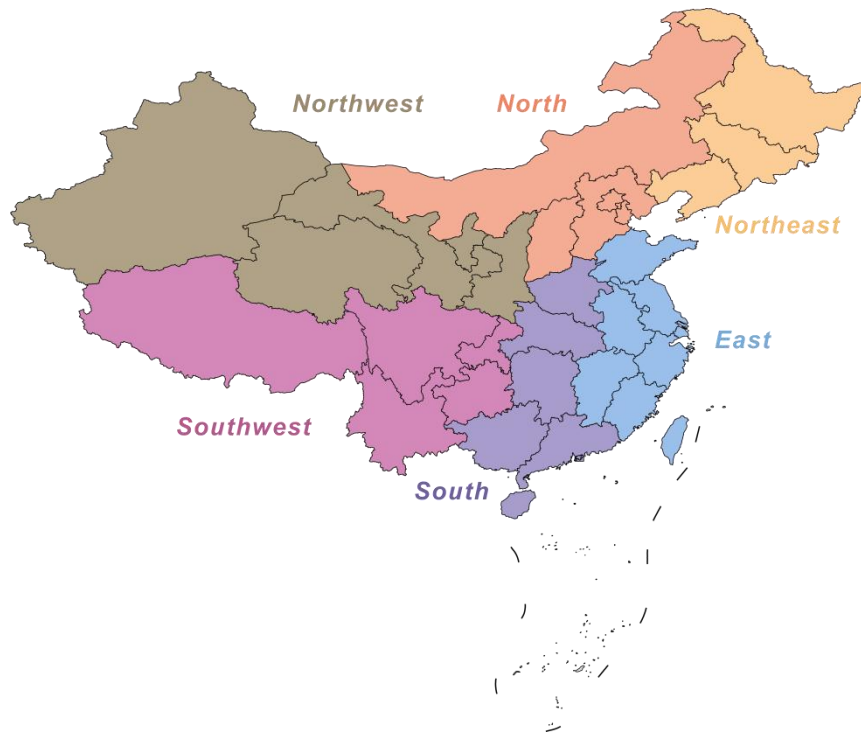

**Figure S1.** Map of provincial divisions grouped by six major regions in China. The six regions include North, Northeast, East, South, Southwest, and Northwest China, as defined in Table S1.

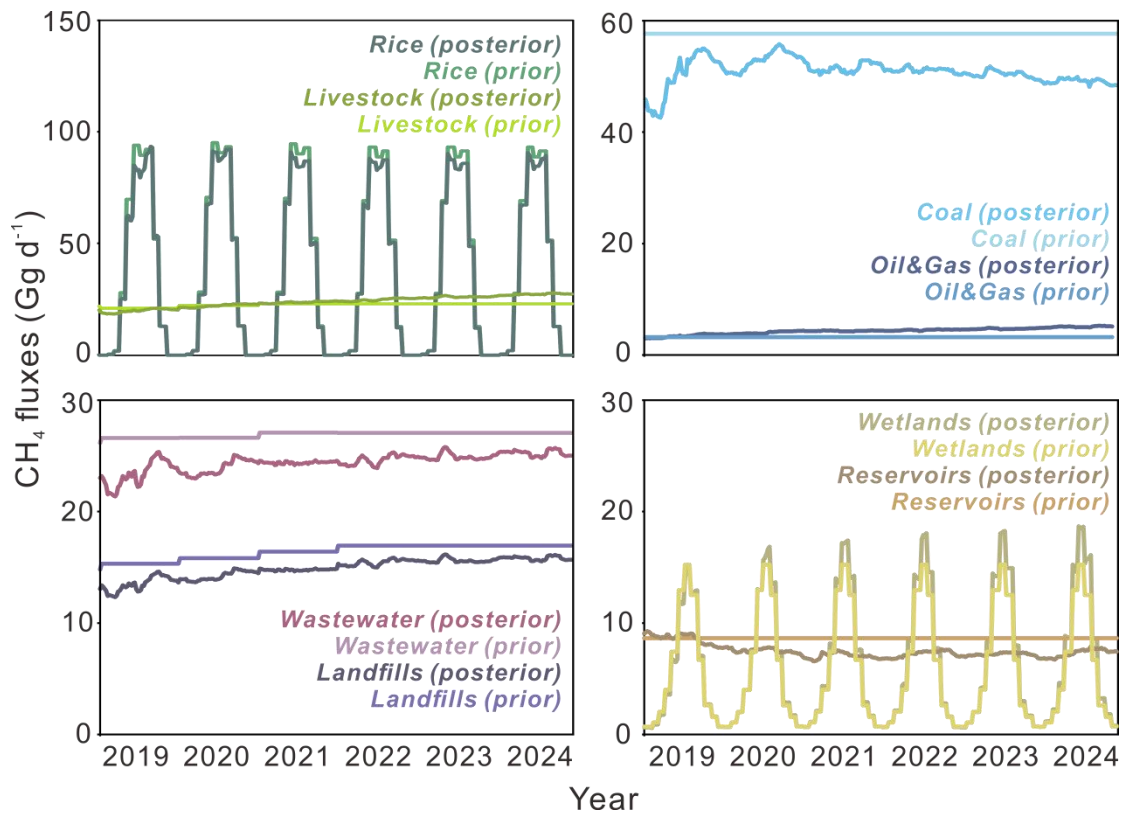

**Figure S2.** Weekly CH<sub>4</sub> emission fluxes from key sectors in China during 2019–2024. The sectors include rice cultivation, livestock, coal mining, oil and gas system, wastewater, landfills, wetlands, and reservoirs.

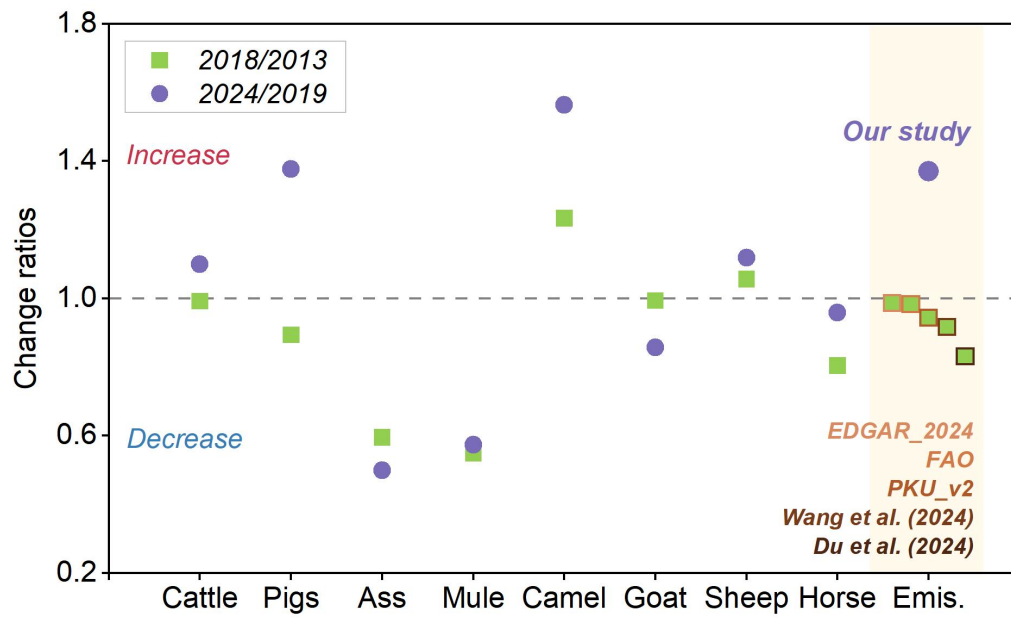

**Figure S3.** Comparison of livestock population and CH<sub>4</sub> emission changes between 2013–2018 (green) and 2019–2024 (purple). Emission ratios for 2018 relative to 2013 are derived from EDGAR\_2024 [7], FAO [8], PKU\_v2 [9, 10], Wang et al. (2024) [13], and Du et al. (2024) [14].

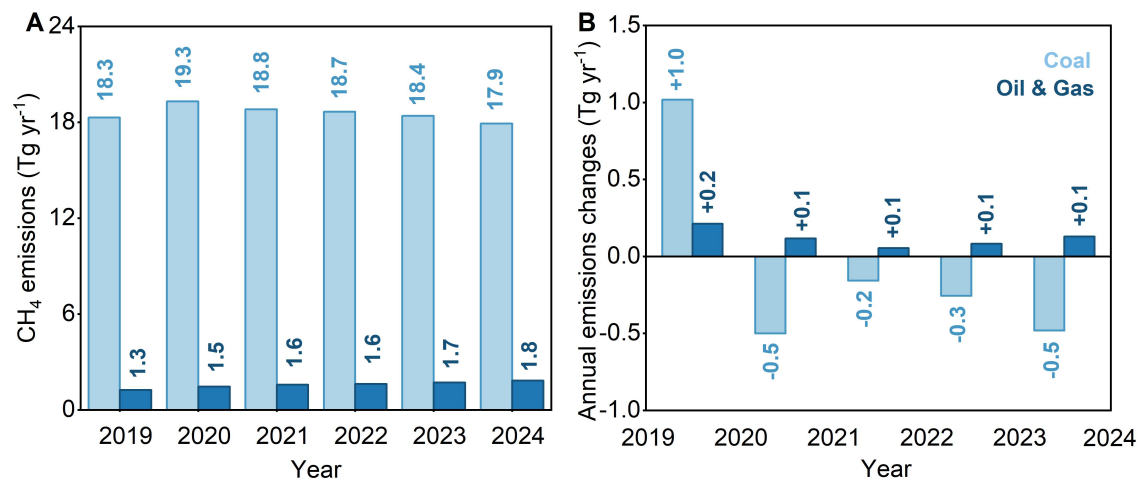

**Figure S4.** Annual CH<sub>4</sub> emissions (A) and interannual emission changes (B) for the coal and oil & gas sectors from 2019 to 2024.

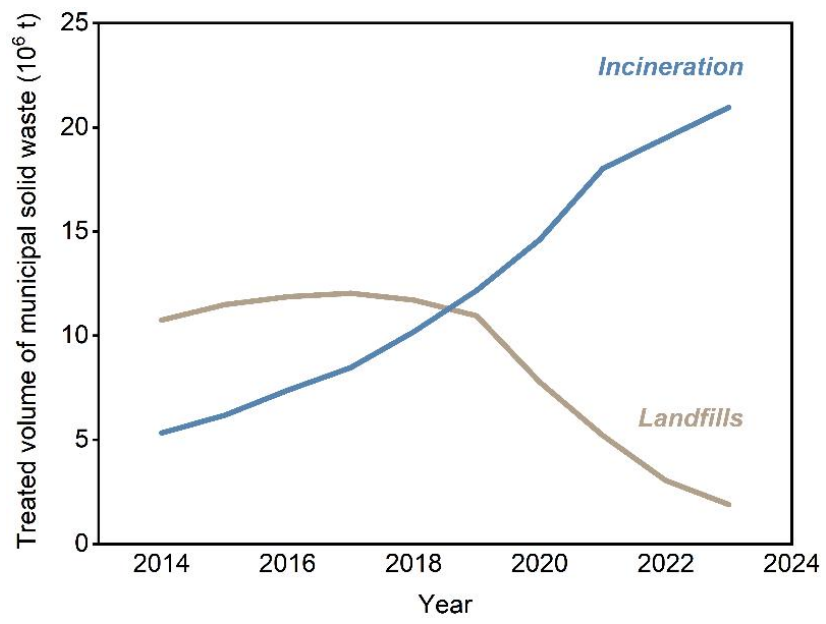

**Figure S5.** The treated volume of municipal solid waste by landfills and incineration.

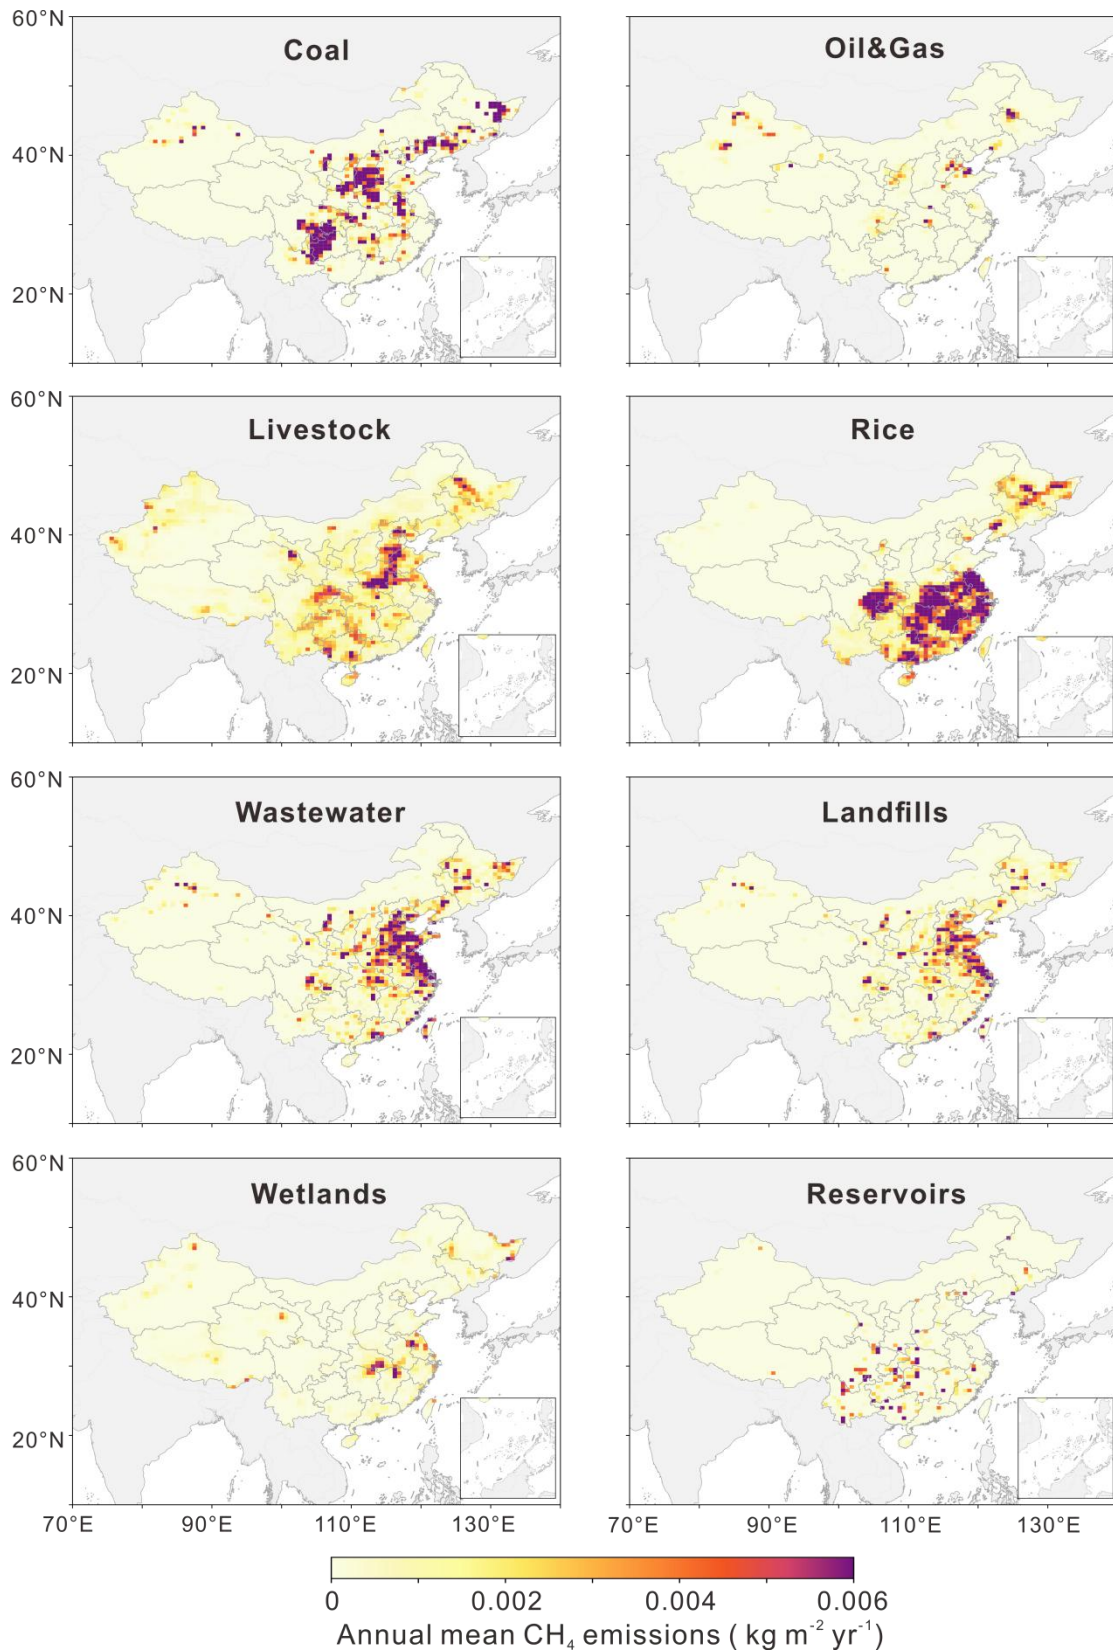

**Figure S6.** Spatial distribution of sectoral mean  $\text{CH}_4$  emissions between 2019 and 2024.

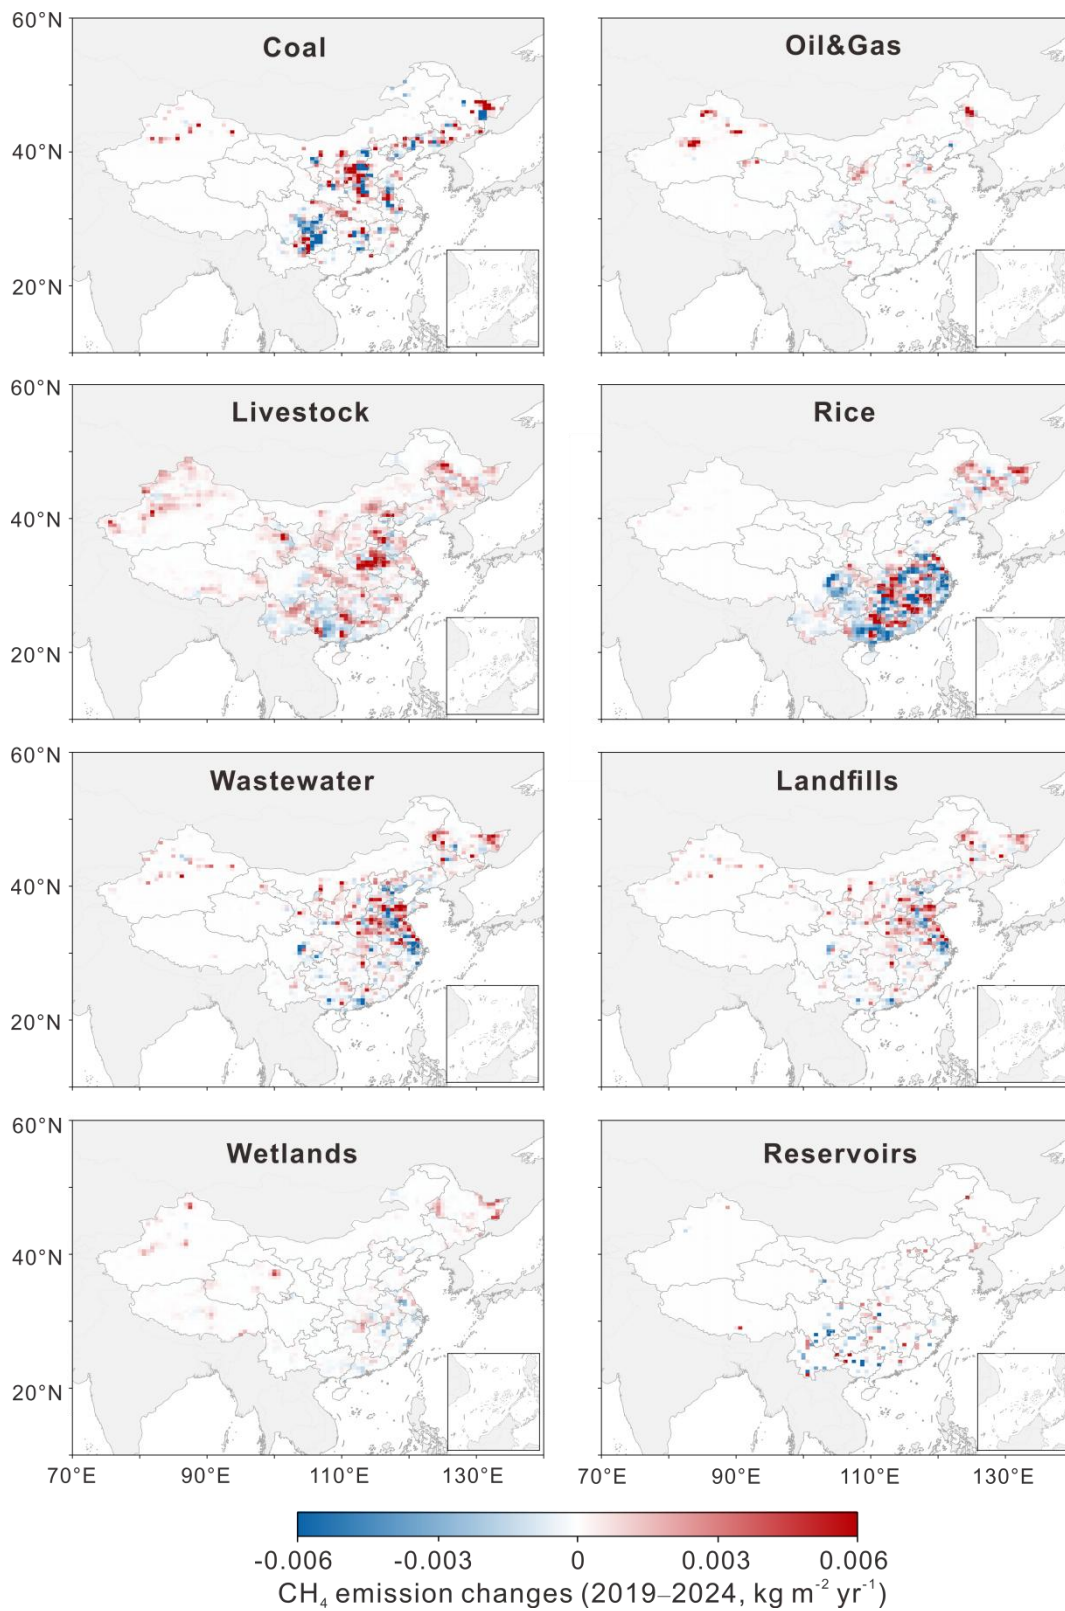

**Figure S7.** Spatial distribution of sectoral CH<sub>4</sub> emission changes from 2019 to 2024.

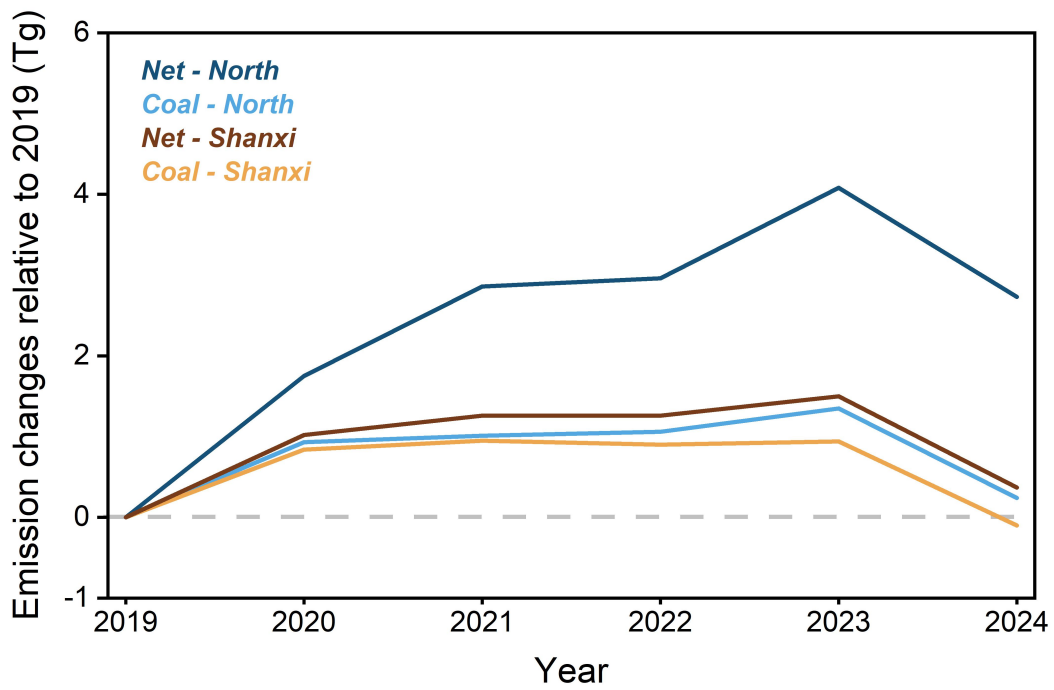

**Figure S8.** Annual net and coal CH<sub>4</sub> emission changes relative to 2019 for North China and Shanxi Province from 2010 to 2024.

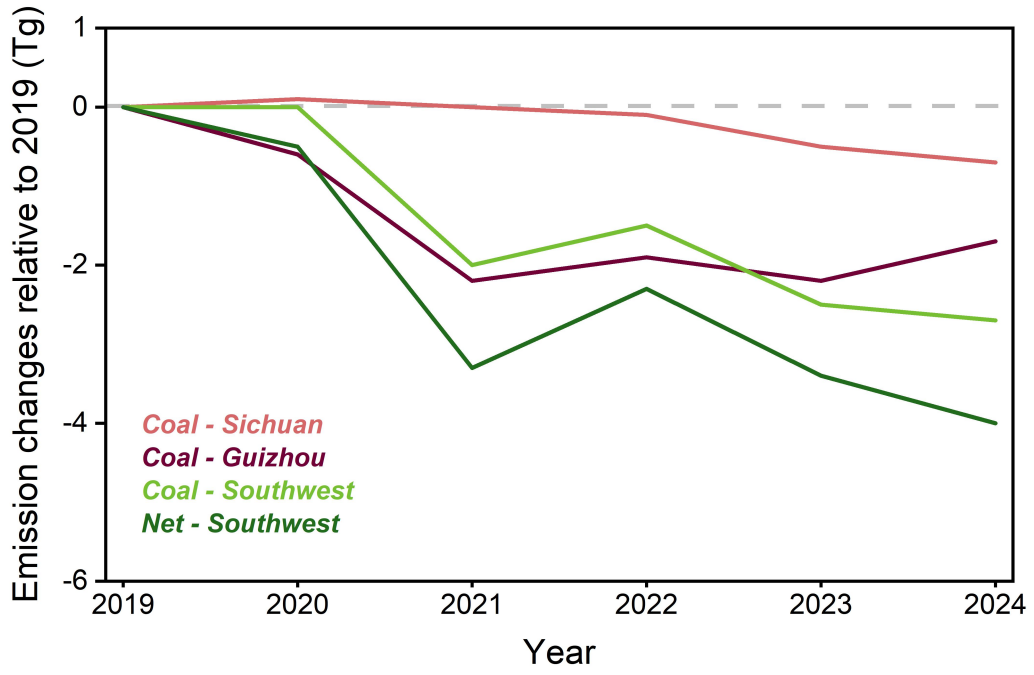

**Figure S9.** Annual net and coal CH<sub>4</sub> emission changes relative to 2019 for Southwest China, Sichuan Province, Guizhou Province, and Chongqing City.

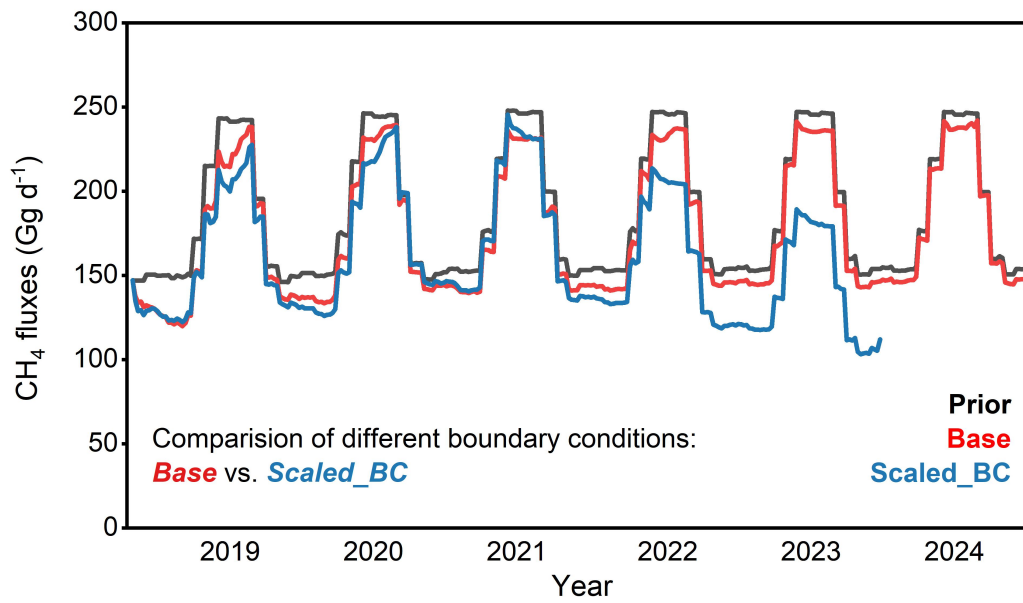

**Figure S10.** Comparison of China's weekly CH<sub>4</sub> emission fluxes under different boundary condition configurations.

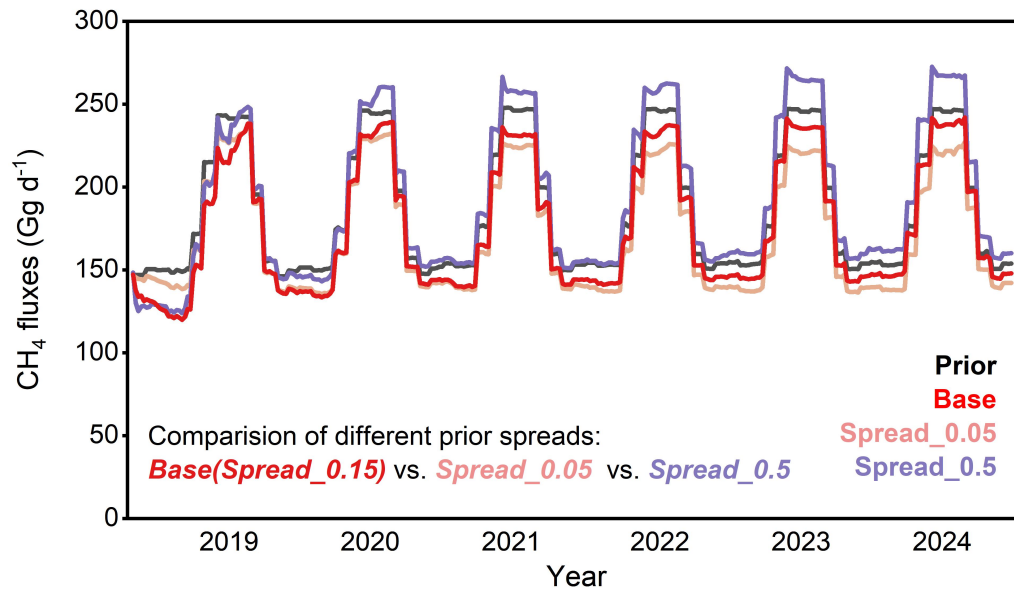

**Figure S11.** Comparison of China's weekly CH<sub>4</sub> emission fluxes under different prior spreads settings.

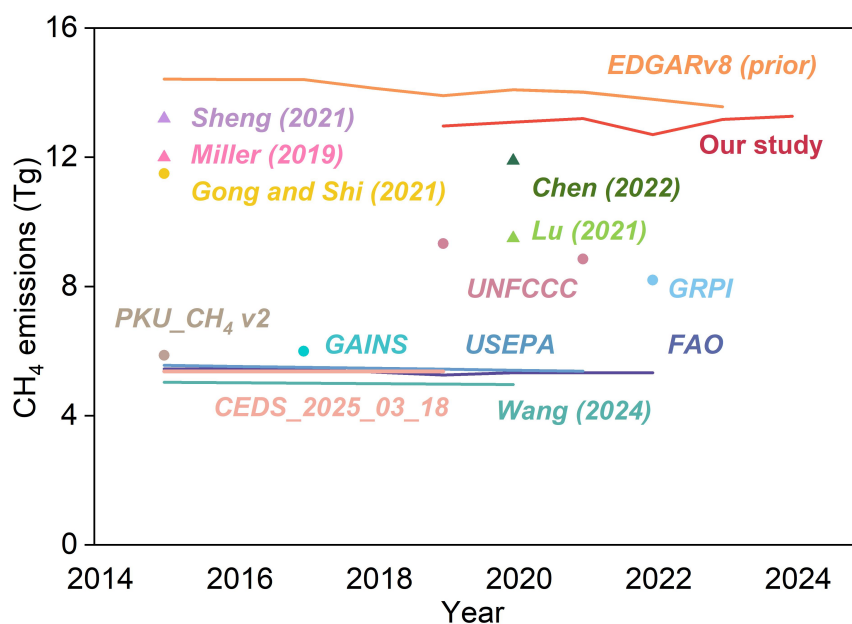

**Figure S12.** Comparisons of China's CH<sub>4</sub> emissions for rice cultivation between 2015 and 2024. Previous estimates includes Sheng et al. (2021) [15], Miller et al. (2019) [16], Gong and Shi (2021) [17], Huang et al. (2019), Chen et al. (2022) [18], Lu et al. (2021) [19], Wang et al. (2024) [20], PKU-CH<sub>4</sub> v2 [10, 21], United Nations Framework Convention on Climate Change (UNFCCC) [22], EDGARv8 [6], Greenhouse Gas and Air Pollution Interactions and Synergies (GAINS) model [23], CEDS\_2025\_03\_18 [11], USEPA [24], FAO [25], and GRPI [26].

## Reference

1. Zhang, F. and X. Huang, *Trend and spatiotemporal distribution of fatal landslides triggered by non-seismic effects in China*. *Landslides*, 2018. **15**(8): p. 1663-1674.
2. Schuldt, K.N., et al., *Multi-laboratory compilation of atmospheric carbon dioxide data for the period 1983-2023; obspack\_ch4\_1\_GLOBALVIEWplus\_v7.0\_2024-10-29*. 2024, NOAA Global Monitoring Laboratory.
3. Zhao, M., et al., *Slowdown in China's methane emission growth*. *Natl Sci Rev*, 2024. **11**(8): p. nwae223.
4. Saunois, M., et al., *Global Methane Budget 2000-2020*. *Earth Syst. Sci. Data Discuss.*, 2024. **2024**: p. 1-147.
5. Janardanan, R., et al., *Country-Scale Analysis of Methane Emissions with a High-Resolution Inverse Model Using GOSAT and Surface Observations*. *Remote Sensing*, 2020. **12**(3): p. 375.
6. Crippa, M., et al., *GHG emissions of all world countries*. 2023, Publications Office of the European Union,; Luxembourg.
7. Crippa, M., Guizzardi, D., Pagani, F., Banja, M., Muntean, M., Schaaf, E., Monforti-Ferrario, F., Becker, W., Quadrelli, R., Riskey Martin, A., Taghavi-Moharamli, P., Köykkä, J., Grassi, G., Rossi, S., Melo, J., Oom, D., Branco, A., San-Miguel, J., Manca, G., Pisoni, E., Vignati, E. and Pekar, F., *GHG emissions of all world countries*. 2024, Publications Office of the European Union: Luxembourg.
8. FAO. *FAOSTAT Climate Change: Agrifood systems emissions; Emissions from Energy use in agriculture*. 2024; Available from: <http://www.fao.org/faostat/en/#data/GN>.
9. Peng, S., et al., *Inventory of anthropogenic methane emissions in mainland China from 1980 to 2010*. *Atmospheric Chemistry and Physics*, 2016. **16**(22): p. 14545-14562.
10. Liu, G., et al., *Recent Slowdown of Anthropogenic Methane Emissions in China Driven by Stabilized Coal Production*. *Environmental Science & Technology Letters*, 2021. **8**(9): p. 739-746.
11. Hoesly, R., Smith, S. J., Ahsan, H., Prime, N., O'Rourke, P., Crippa, M., Klimont, Z., Guizzardi, D., Feng, L., Harkins, C., MCDONALD, B., & Wang, S. , *CEDS v\_2025\_03\_18 Aggregate Data (v\_2025\_03\_18)* 2025: Zenodo.
12. Cui, D., et al., *Monthly methane emissions in Chinese mainland provinces from 2013–2022*. *Scientific Data*, 2025. **12**(1): p. 948.
13. Wang, Y., et al., *Mitigation potential of methane emissions in China's livestock sector can reach one-third by 2030 at low cost*. *Nature Food*, 2024. **5**(7): p. 603-614.
14. Du, M., et al., *City-level livestock methane emissions in China from 2010 to 2020*, in *figshare. Dataset*. 2024

15. Sheng, J., et al., *Sustained methane emissions from China after 2012 despite declining coal production and rice-cultivated area*. Environmental Research Letters, 2021. **16**(10): p. 104018.
16. Miller, S.M., et al., *China's coal mine methane regulations have not curbed growing emissions*. Nature Communications, 2019. **10**(1): p. 303.
17. Gong, S. and Y. Shi, *Evaluation of comprehensive monthly-gridded methane emissions from natural and anthropogenic sources in China*. Science of The Total Environment, 2021. **784**: p. 147116.
18. Chen, Z., et al., *Methane emissions from China: a high-resolution inversion of TROPOMI satellite observations*. Atmospheric Chemistry and Physics, 2022. **22**(16): p. 10809-10826.
19. Lu, X., et al., *Global methane budget and trend, 2010–2017: complementarity of inverse analyses using in situ (GLOBALVIEWplus CH4 ObsPack) and satellite (GOSAT) observations*. Atmos. Chem. Phys., 2021. **21**(6): p. 4637-4657.
20. Wang, Z., et al., *Estimates of methane emissions from Chinese rice fields using the DNDC model*. Agricultural and Forest Meteorology, 2021. **303**: p. 108368.
21. Peng, S., et al., *Inventory of anthropogenic methane emissions in mainland China from 1980 to 2010*. Atmos. Chem. Phys., 2016. **16**(22): p. 14545-14562.
22. Ministry of Ecology and Environment of the People's Republic of China, *The People's Republic of China Second Biennial Update Report on Climate Change*. 2018.
23. Höglund-Isaksson, L., *Global anthropogenic methane emissions 2005–2030: technical mitigation potentials and costs*. Atmos. Chem. Phys., 2012. **12**(19): p. 9079-9096.
24. United States Environmental Protection Agency (EPA), *Global Anthropogenic Non-CO2 Greenhouse Gas Emissions: 1990 - 2030*. 2012, United States Environmental Protection Agency: Washington, DC.
25. Food and Agriculture Organization of the United Nations, *FAOSTAT*. 2025.
26. Chen, Z. and D. Jacob, *Global Rice Paddy Inventory (GRPI): a high-resolution inventory of methane emissions from rice agriculture based on Landsat satellite inundation data (v1.0) 2025*: Zenodo.
